# Supplementary material for: Vitis vinifera polyphenols from seedless black fruit act synergistically to suppress hepatotoxicity by targeting necroptosis and pro-fibrotic mediators
Source: PubMed Central journal article supplement (PMC7016101; doi:10.1038/s41598-020-59489-z), 2020-02-12
Supplement: 41598_2020_59489_MOESM2_ESM.pdf [file 41598_2020_59489_MOESM2_ESM.pdf]

# *Vitis vinifera* polyphenols from seedless black fruit act synergistically to suppress hepatotoxicity by targeting necroptosis and pro-fibrotic mediators

Marwa M. Abu-Serie<sup>a\*</sup>, Noha H. Habashy<sup>b</sup>.

<sup>a</sup>Department of Medical Biotechnology, Genetic Engineering, and Biotechnology Research Institute, City for Scientific Research and Technology Applications (SRTA-City), New Borg EL-Arab 21934, Alexandria, Egypt. **Phone:** +2034593422 **Fax:** +2034593407

<sup>b</sup>Biochemistry Department, Faculty of Science, Alexandria University, Alexandria 21511, Egypt.

\*Correspondence: [marwaelhedaia@gmail.com](mailto:marwaelhedaia@gmail.com) and [noha.habashi@alexu.edu.eg](mailto:noha.habashi@alexu.edu.eg)

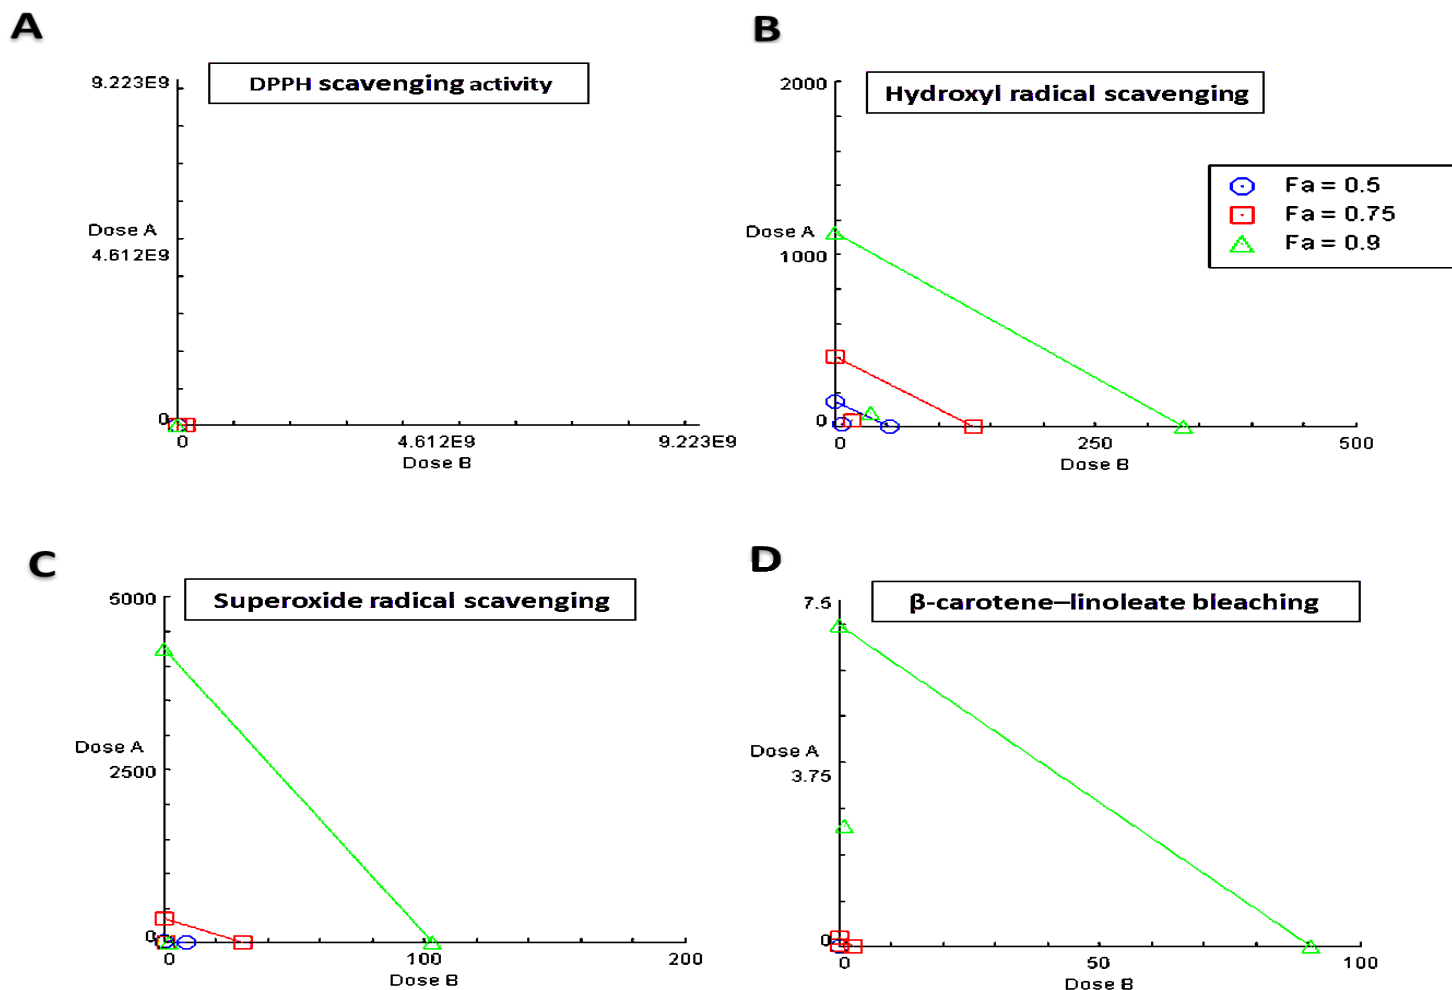

Supplementary Figure 2
